# Supplementary material for: Synthesis, structure, and magnetic and catalytic properties of metal frameworks with 2,2′-dinitro-4,4′-biphenyldicarboxylate and imidazole-containing tripodal ligands
Source: Royal Society of Chemistry journal article supplement (doi:10.1039/c6dt00568c), 2016-01-01
Supplement: c6dt00568c1.pdf [file c6dt00568c1.pdf]

## Electronic supplementary information (ESI)

### Synthesis, structure, magnetic and catalytic properties of metal frameworks with 2,2'-dinitro-4,4'-biphenyldicarboxylate and imidazole-containing tripodal ligands

Yu-Ling Li,<sup>a,b</sup> Dan Zhao,<sup>a</sup> Yue Zhao,<sup>a</sup> Peng Wang,<sup>a</sup> Huai-Wei Wang<sup>a</sup> and Wei-Yin Sun\*<sup>a</sup>

<sup>a</sup> Coordination Chemistry Institute, State Key Laboratory of Coordination Chemistry, School of Chemistry and Chemical Engineering, Nanjing National Laboratory of Microstructures, Collaborative Innovation Center of Advanced Microstructures, Nanjing University, Nanjing 210023, China. E-mail address: sunwy@nju.edu.cn; Tel: +86 25 89683485

<sup>b</sup> School of Chemistry & Pharmaceutical Engineering, Nanyang Normal University, Nanyang 473061, Henan, China

**Table S1** Selected bond lengths (Å) and angles (°) for **1-4**.<sup>a</sup>

| Complex 1             |            |                     |            |
|-----------------------|------------|---------------------|------------|
| Mn(1)-O(10)           | 2.081(3)   | Mn(1)-O(19)#1       | 2.085(3)   |
| Mn(1)-O(1)            | 2.209(3)   | Mn(1)-O(11)#2       | 2.223(2)   |
| Mn(1)-O(2)            | 2.267(2)   | Mn(1)-O(12)#2       | 2.342(2)   |
| Mn(2)-O(4)#3          | 2.139(3)   | Mn(2)-O(1W)         | 2.205(3)   |
| Mn(2)-O(18)           | 2.208(2)   | Mn(2)-O(9)          | 2.213(3)   |
| Mn(2)-N(7)            | 2.240(3)   | Mn(2)-O(20)#4       | 2.249(2)   |
| Mn(3)-O(3)#3          | 2.075(3)   | Mn(3)-O(17)         | 2.131(2)   |
| Mn(3)-N(9)#5          | 2.207(3)   | Mn(3)-O(2W)         | 2.279(3)   |
| Mn(3)-O(12)#2         | 2.292(3)   | Mn(3)-O(10)         | 2.477(3)   |
| O(10)-Mn(1)-O(19)#1   | 99.75(10)  | O(10)-Mn(1)-O(1)    | 124.57(11) |
| O(19)#1-Mn(1)-O(1)    | 127.48(10) | O(10)-Mn(1)-O(11)#2 | 129.97(9)  |
| O(19)#1-Mn(1)-O(11)#2 | 85.78(10)  | O(1)-Mn(1)-O(11)#2  | 85.57(10)  |
| O(10)-Mn(1)-O(2)      | 103.45(10) | O(19)#1-Mn(1)-O(2)  | 87.49(10)  |

|                      |            |                       |            |
|----------------------|------------|-----------------------|------------|
| O(1)-Mn(1)-O(2)      | 58.26(9)   | O(11)#2-Mn(1)-O(2)    | 126.54(10) |
| O(10)-Mn(1)-O(12)#2  | 78.04(9)   | O(19)#1-Mn(1)-O(12)#2 | 119.89(9)  |
| O(1)-Mn(1)-O(12)#2   | 78.04(9)   | O(11)#2-Mn(1)-O(12)#2 | 57.28(9)   |
| O(2)-Mn(1)-O(12)#2   | 152.22(10) | O(4)#3-Mn(2)-O(1W)    | 81.30(11)  |
| O(4)#3-Mn(2)-O(18)   | 107.85(10) | O(1W)-Mn(2)-O(18)     | 79.57(11)  |
| O(4)#3-Mn(2)-O(9)    | 94.09(10)  | O(1W)-Mn(2)-O(9)      | 155.75(10) |
| O(18)-Mn(2)-O(9)     | 79.26(10)  | O(4)#3-Mn(2)-N(7)     | 163.60(11) |
| O(1W)-Mn(2)-N(7)     | 92.31(11)  | O(18)-Mn(2)-N(7)      | 85.60(10)  |
| O(9)-Mn(2)-N(7)      | 97.72(10)  | O(4)#3-Mn(2)-O(20)#4  | 81.03(10)  |
| O(1W)-Mn(2)-O(20)#4  | 115.99(10) | O(18)-Mn(2)-O(20)#4   | 163.57(10) |
| O(9)-Mn(2)-O(20)#4   | 86.44(9)   | N(7)-Mn(2)-O(20)#4    | 88.37(10)  |
| O(3)#3-Mn(3)-O(17)   | 99.08(11)  | O(3)#3-Mn(3)-N(9)#5   | 170.97(11) |
| O(17)-Mn(3)-N(9)#5   | 84.30(10)  | O(3)#3-Mn(3)-O(2W)    | 86.34(11)  |
| O(17)-Mn(3)-O(2W)    | 81.81(10)  | N(9)#5-Mn(3)-O(2W)    | 102.47(10) |
| O(3)#3-Mn(3)-O(12)#2 | 90.66(10)  | O(17)-Mn(3)-O(12)#2   | 156.96(9)  |
| N(9)#5-Mn(3)-O(12)#2 | 89.28(10)  | O(2W)-Mn(3)-O(12)#2   | 78.00(9)   |
| O(3)#3-Mn(3)-O(10)   | 80.50(10)  | O(17)-Mn(3)-O(10)     | 130.51(9)  |
| N(9)#5-Mn(3)-O(10)   | 90.92(9)   | O(2W)-Mn(3)-O(10)     | 146.51(9)  |
| O(12)#2-Mn(3)-O(10)  | 71.54(9)   |                       |            |

Symmetry codes: #1  $3/2-x, -1/2+y, 1/2-z$ ; #2  $1/2+x, 1/2-y, 1/2+z$ ; #3  $-x, 1-y, 1-z$ ; #4  $-1+x, y, z$ ; #5  $1-x, 1-y, -z$ .

---

### Complex 2

|                   |            |                  |           |
|-------------------|------------|------------------|-----------|
| Cd(1)-O(1)        | 2.173(2)   | Cd(1)-O(18)      | 2.269(2)  |
| Cd(1)-N(5)#1      | 2.242(2)   | Cd(1)-O(1W)      | 2.386(2)  |
| Cd(1)-O(12)#2     | 2.496(2)   | Cd(1)-O(9)       | 2.531(2)  |
| Cd(1)-O(10)       | 2.362(2)   | Cd(2)-O(2)       | 2.271(2)  |
| Cd(2)-N(1)        | 2.296(2)   | Cd(2)-O(2W)      | 2.303(3)  |
| Cd(2)-O(17)       | 2.330(2)   | Cd(2)-O(20)#3    | 2.333(2)  |
| Cd(2)-O(10)       | 2.362(2)   | Cd(3)-O(9)#4     | 2.201(2)  |
| Cd(3)-O(19)       | 2.243(2)   | Cd(3)-O(3)#5     | 2.294(2)  |
| Cd(3)-O(11)#1     | 2.335(2)   | Cd(3)-O(11)#1    | 2.335(2)  |
| Cd(3)-O(4)#5      | 2.358(2)   | Cd(3)-O(12)#1    | 2.387(2)  |
| O(1)-Cd(1)-N(5)#1 | 170.00(10) | O(1)-Cd(1)-O(18) | 103.47(9) |

|                      |           |                       |           |
|----------------------|-----------|-----------------------|-----------|
| N(5)#1-Cd(1)-O(18)   | 85.84(8)  | O(1)-Cd(1)-O(1W)      | 85.45(9)  |
| N(5)#1-Cd(1)-O(1W)   | 99.50(8)  | O(18)-Cd(1)-O(1W)     | 82.96(8)  |
| O(1)-Cd(1)-O(12)#2   | 83.72(9)  | N(5)#1-Cd(1)-O(12)#2  | 89.20(9)  |
| O(18)-Cd(1)-O(12)#2  | 155.89(8) | O(1W)-Cd(1)-O(12)#2   | 74.61(7)  |
| O(1)-Cd(1)-O(9)      | 78.45(9)  | N(5)#1-Cd(1)-O(9)     | 92.57(8)  |
| O(18)-Cd(1)-O(9)     | 133.01(7) | O(1W)-Cd(1)-O(9)      | 143.02(8) |
| O(12)#2-Cd(1)-O(9)   | 70.72(7)  | O(1)-Cd(1)-O(10)      | 93.31(8)  |
| N(5)#1-Cd(1)-O(10)   | 84.07(8)  | O(18)-Cd(1)-O(10)     | 83.20(7)  |
| O(1W)-Cd(1)-O(10)    | 165.40(7) | O(12)#2-Cd(1)-O(10)   | 119.76(6) |
| O(9)-Cd(1)-O(10)     | 50.03(6)  | O(2)-Cd(2)-N(1)       | 165.39(8) |
| O(2)-Cd(2)-O(2W)     | 80.52(10) | N(1)-Cd(2)-O(2W)      | 95.99(10) |
| O(2)-Cd(2)-O(17)     | 109.61(8) | N(1)-Cd(2)-O(17)      | 83.54(8)  |
| O(2W)-Cd(2)-O(17)    | 80.36(9)  | O(2)-Cd(2)-O(20)#3    | 78.81(8)  |
| N(1)-Cd(2)-O(20)#3   | 90.98(8)  | O(2W)-Cd(2)-O(20)#3   | 120.25(9) |
| O(17)-Cd(2)-O(20)#3  | 159.21(9) | O(2)-Cd(2)-O(10)      | 93.11(8)  |
| N(1)-Cd(2)-O(10)     | 96.13(8)  | O(2W)-Cd(2)-O(10)     | 152.97(8) |
| O(17)-Cd(2)-O(10)    | 77.12(8)  | O(20)#3-Cd(2)-O(10)   | 83.57(7)  |
| O(9)#4-Cd(3)-O(19)   | 96.38(8)  | O(9)#4-Cd(3)-O(3)#5   | 132.90(9) |
| O(19)-Cd(3)-O(3)#5   | 122.21(8) | O(9)#4-Cd(3)-O(11)#1  | 127.15(8) |
| O(19)-Cd(3)-O(11)#1  | 85.06(8)  | O(3)#5-Cd(3)-O(11)#1  | 85.47(8)  |
| O(9)#4-Cd(3)-O(4)#5  | 107.05(8) | O(19)-Cd(3)-O(4)#5    | 85.81(8)  |
| O(3)#5-Cd(3)-O(4)#5  | 56.04(7)  | O(11)#1-Cd(3)-O(4)#5  | 125.69(7) |
| O(9)#4-Cd(3)-O(12)#1 | 78.60(7)  | O(19)-Cd(3)-O(12)#1   | 117.82(7) |
| O(3)#5-Cd(3)-O(12)#1 | 102.19(7) | O(11)#1-Cd(3)-O(12)#1 | 55.46(7)  |
| O(4)#5-Cd(3)-O(12)#1 | 155.41(8) |                       |           |

Symmetry codes: #1 -x,-y,2-z; #2 -1/2+x,-1/2-y,-1/2+z; #3 1+x,y,z; #4 -1/2-x,1/2+y,3/2-z; #5 -3/2+x,1/2-y,1/2+z.

---

### Complex 3

|               |          |             |          |
|---------------|----------|-------------|----------|
| Zn(1)-O(24)#1 | 1.948(3) | Zn(1)-N(1)  | 1.991(3) |
| Zn(1)-O(22)   | 2.002(3) | Zn(1)-N(7)  | 2.014(4) |
| Zn(2)-O(7)#2  | 1.936(3) | Zn(2)-O(5)  | 1.958(3) |
| Zn(2)-N(3)#3  | 2.010(3) | Zn(2)-N(11) | 2.050(4) |
| Zn(3)-O(21)   | 1.981(4) | Zn(3)-N(5)  | 2.010(4) |

|                     |            |                    |            |
|---------------------|------------|--------------------|------------|
| Zn(3)-O(13)         | 2.002(5)   | Zn(3)-N(9)         | 2.024(4)   |
| Zn(3)-O(14)         | 2.469(6)   | O(24)#1-Zn(1)-N(1) | 116.38(13) |
| O(24)#1-Zn(1)-O(22) | 102.77(12) | N(1)-Zn(1)-O(22)   | 115.62(12) |
| O(24)#1-Zn(1)-N(7)  | 97.36(14)  | N(1)-Zn(1)-N(7)    | 112.46(14) |
| O(22)-Zn(1)-N(7)    | 110.46(12) | O(7)#2-Zn(2)-O(5)  | 110.47(13) |
| O(7)#2-Zn(2)-N(3)#3 | 125.78(14) | O(5)-Zn(2)-N(3)#3  | 105.38(14) |
| O(7)#2-Zn(2)-N(11)  | 107.35(14) | O(5)-Zn(2)-N(11)   | 105.03(12) |
| N(3)#3-Zn(2)-N(11)  | 100.80(13) | O(21)-Zn(3)-N(5)   | 119.87(17) |
| O(21)-Zn(3)-O(13)   | 106.9(2)   | N(5)-Zn(3)-O(13)   | 116.76(19) |
| O(21)-Zn(3)-N(9)    | 109.06(17) | N(5)-Zn(3)-N(9)    | 104.43(14) |
| O(13)-Zn(3)-N(9)    | 97.2(2)    | O(21)-Zn(3)-O(14)  | 89.73(18)  |
| N(5)-Zn(3)-O(14)    | 86.00(17)  | O(13)-Zn(3)-O(14)  | 51.6(2)    |
| N(9)-Zn(3)-O(14)    | 148.81(18) |                    |            |

Symmetry codes: #1  $2-x, 1/2+y, 1/2-z$ ; #2  $-1-x, 1/2+y, 1/2-z$ ; #3  $-1+x, 3/2-y, -1/2+z$ .

---

#### Complex 4

|                  |           |                  |           |
|------------------|-----------|------------------|-----------|
| Cd(1)-O(1W)      | 2.277(2)  | Cd(1)-N(3)       | 2.298(2)  |
| Cd(1)-N(5)       | 2.305(2)  | Cd(1)-N(1)       | 2.312(2)  |
| Cd(1)-O(1)       | 2.348(2)  | Cd(1)-O(2)       | 2.434(2)  |
| O(1W)-Cd(1)-N(3) | 87.84(6)  | O(1W)-Cd(1)-N(5) | 104.49(6) |
| N(3)-Cd(1)-N(5)  | 97.11(6)  | O(1W)-Cd(1)-N(1) | 86.61(6)  |
| N(3)-Cd(1)-N(1)  | 174.30(6) | N(5)-Cd(1)-N(1)  | 85.57(6)  |
| O(1W)-Cd(1)-O(1) | 147.58(6) | N(3)-Cd(1)-O(1)  | 93.57(7)  |
| N(5)-Cd(1)-O(1)  | 107.45(6) | N(1)-Cd(1)-O(1)  | 90.41(6)  |
| O(1W)-Cd(1)-O(2) | 92.79(5)  | N(3)-Cd(1)-O(2)  | 88.76(6)  |
| N(5)-Cd(1)-O(2)  | 161.91(6) | N(1)-Cd(1)-O(2)  | 90.19(6)  |
| O(1)-Cd(1)-O(2)  | 54.92(6)  |                  |           |

---

**Table S2** Hydrogen bonding data of **4**.

---

| Complex <b>4</b>        |                             |                               |                                       |                             |
|-------------------------|-----------------------------|-------------------------------|---------------------------------------|-----------------------------|
| <i>D</i> -H... <i>A</i> | <i>d</i> ( <i>D</i> -H) (Å) | <i>d</i> (H... <i>A</i> ) (Å) | <i>d</i> ( <i>D</i> ... <i>A</i> )(Å) | <i>D</i> -H... <i>A</i> (°) |
| O(1W)-H(1A)··O(4)       | 0.81                        | 1.84                          | 2.644(3)                              | 171                         |
| O(1W)-H(1B)··O(3)       | 0.91                        | 1.85                          | 2.744(3)                              | 167                         |
| C(7)-H(7)··O(3)         | 0.93                        | 2.45                          | 3.378(3)                              | 175                         |
| C(15)-H(15)··O(1W)      | 0.93                        | 2.51                          | 3.324(4)                              | 146                         |
| O(2W)-H(2WB)··O(9)      | 0.90                        | 1.95                          | 2.843(5)                              | 175                         |
| O(2W)-H(2WA)··O(4)      | 0.94                        | 1.91                          | 2.835(3)                              | 166                         |
| C(5)-H(5)··O(2W)        | 0.93                        | 2.53                          | 3.455(4)                              | 172                         |
| C(13)-H(13)··O(2W)      | 0.93                        | 2.56                          | 3.484(4)                              | 172                         |

---

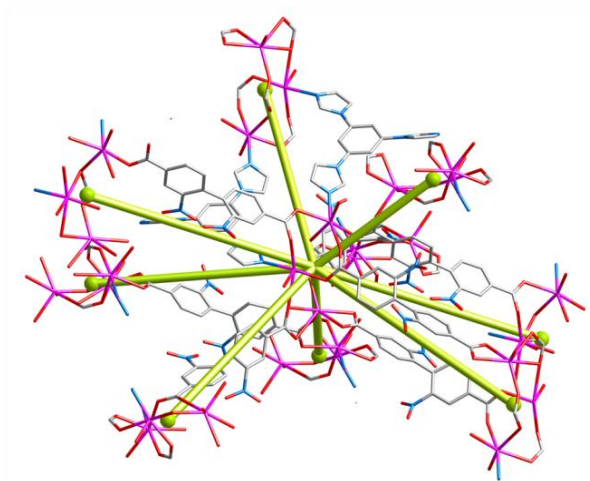

**Fig. S1** The 8-node of SBU in **1**.

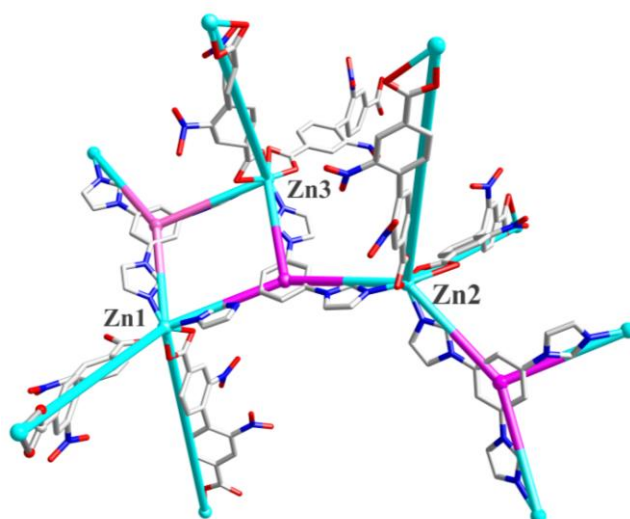

**Fig. S2** Four-, four-, three-, three- and two-connectors in **3**.

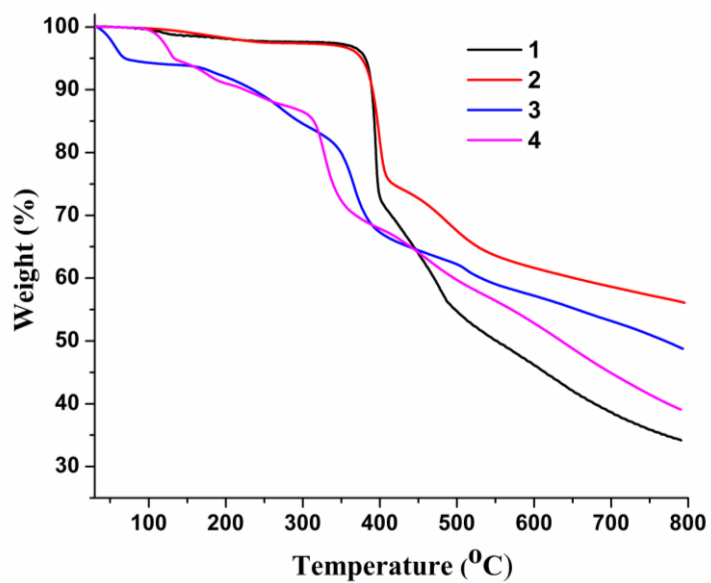

**Fig. S3** TG curves of **1**, **2**, **3** and **4**.

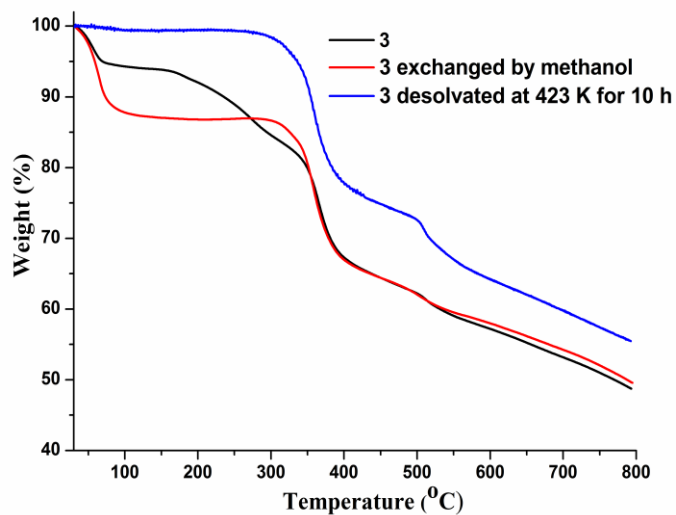

**Fig. S4** TG curves of **3** (black: as-synthesized, red: exchanged by methanol, blue: desolvated at 423 K for 10 h).

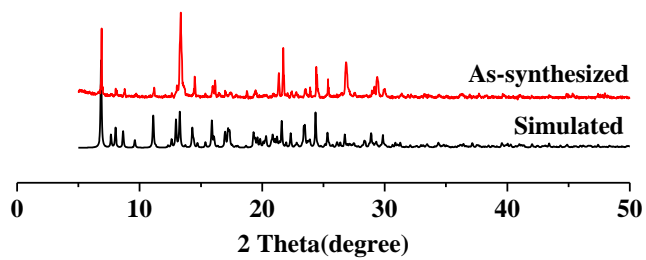

(a)

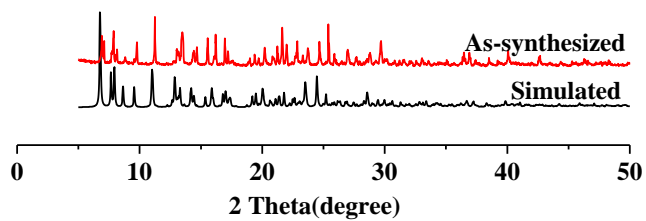

(b)

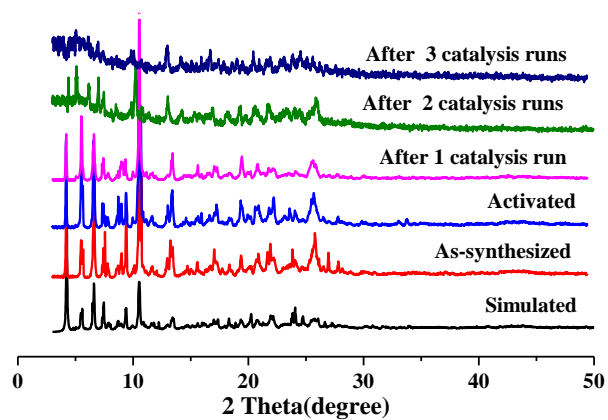

(c)

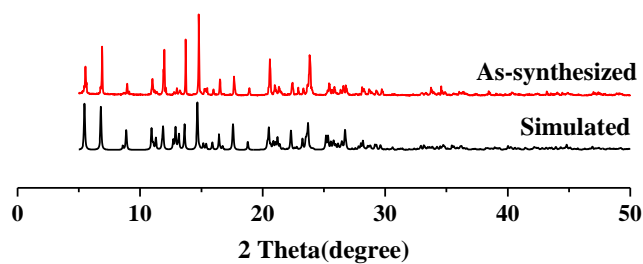

(d)

Fig. S5 PXRD patterns of 1 (a), 2 (b), 3 (c) and 4 (d).



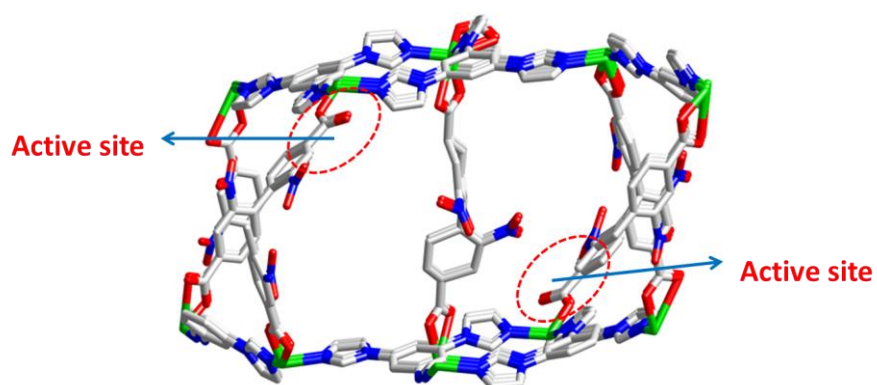

**Fig. S6** The C=O group in the 1D channel of **3**.

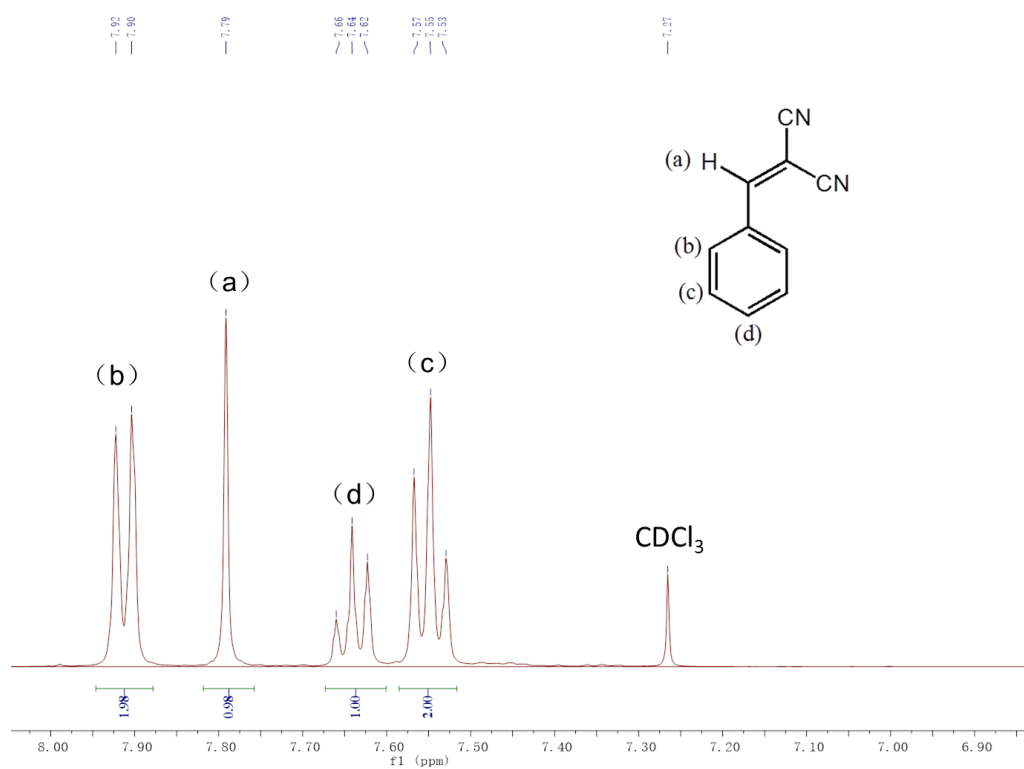

**Fig. S7**  $^1\text{H}$  NMR characterization of Knoevenagel condensation reaction of benzaldehyde with malononitrile, catalyzed by **3'**.

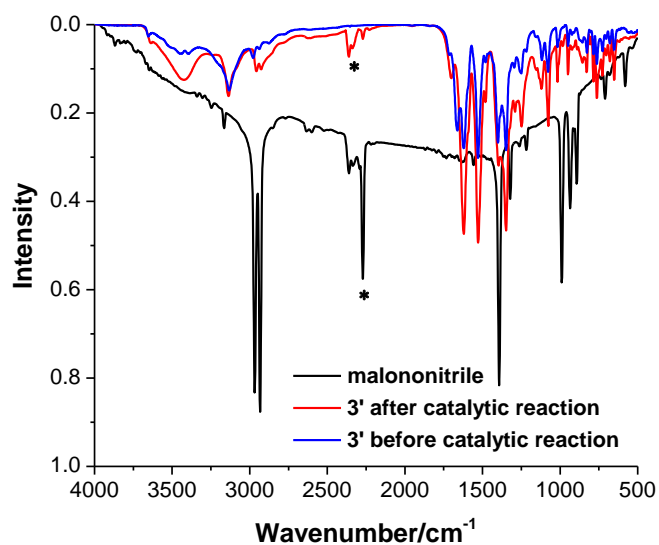

**Fig. S8** IR spectra at room temperature of malononitrile (black), **3'** after catalytic reaction (red) and **3'** before catalytic reaction (blue). The bands marked with an asterisk indicate the -CN stretching vibration bands.

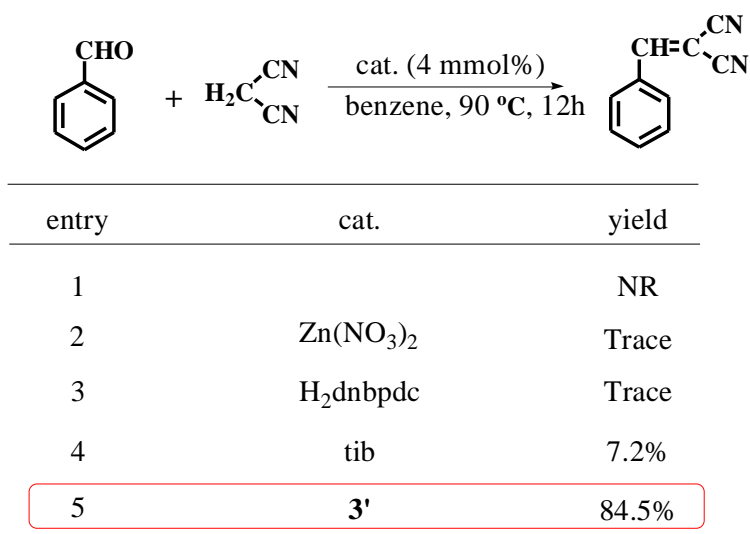

**Fig. S9** Knoevenagel condensation reaction of benzaldehyde with malononitrile, catalyzed by various compounds.

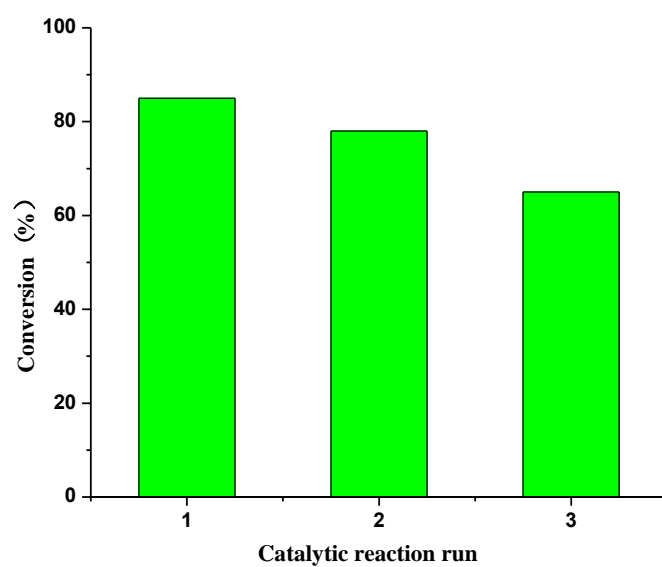

**Fig. S10** The recycled catalysis experiments of **3'**.

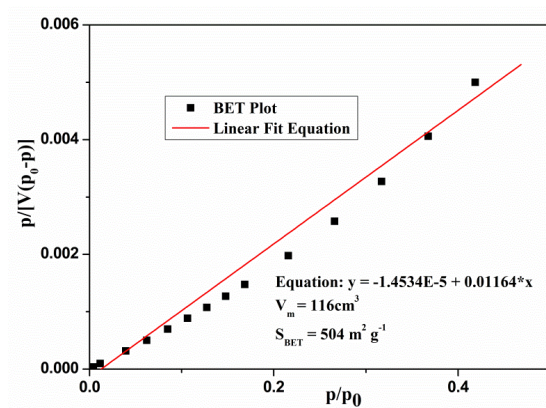

(a)

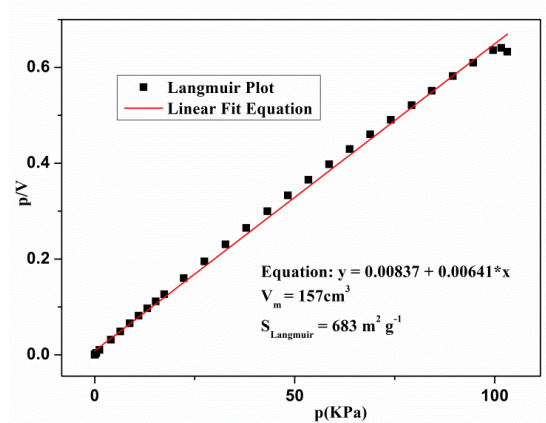

(b)

**Fig. S11** (a) The BET plot calculated from  $\text{N}_2$  isotherm of **3'**. (b) The Langmuir plot calculated from  $\text{N}_2$  isotherm of **3'**.

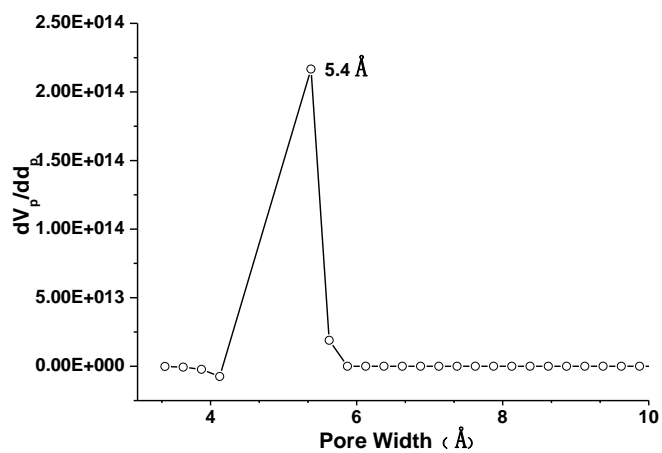

**Fig. S12** Calculated pore size distributions of **3'** according to  $\text{N}_2$  isotherm.
